# Supplementary material
Source: publisher figshare collection journal article supplement (https://acs.figshare.com/ndownloader/files/4624621)
Supplement: Supplementary file 1 [file 4624621]

## Supporting Information

### Directional Affinity of Short Peptides for Synthetic Polymers

Takaaki Date, Keiji Tanaka, Toshihiko Nagamura, and Takeshi Serizawa\*

*Graduate School of Engineering, The University of Tokyo, 7-3-1 Hongo, Bunkyo-ku, Tokyo 113-8654, Japan, Graduate School of Engineering, Kyushu University, 744 Motoooka, Nishi-ku, Fukuoka 819-0395, Japan, Research Center for Advanced Science and Technology (RCAST), The University of Tokyo, 4-6-1 Komaba, Meguro-ku, Tokyo 153-8904, Japan, Precursory Research for Embryonic Science and Technology, and Japan Science and Technology Agency (JST), 4-1-8 Honcho, Kawaguchi, Saitama 332-0012, Japan*

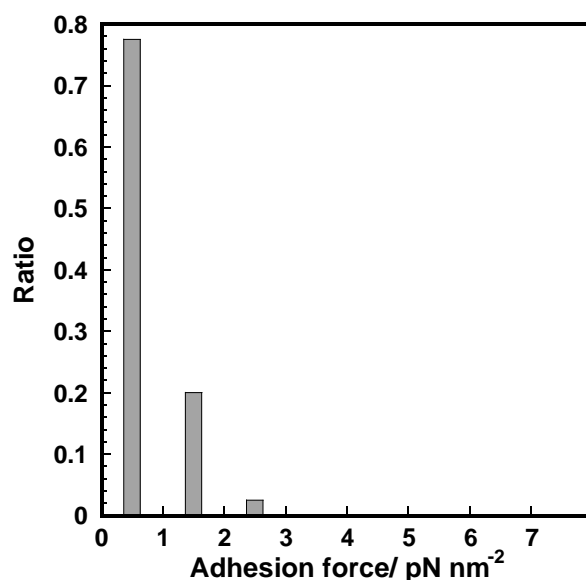

**Figure S1** Histograms of the adhesion forces for combinations of the tip coated with the outermost streptavidin surface (without peptide). The mean adhesion force was estimated to be  $0.8 \text{ pN nm}^{-2}$  by fitting to a Poisson distribution. On the other hand, the mean adhesion force was estimated to be  $0.8 \pm 0.5 \text{ pN nm}^{-2}$  from the original data.
